# Supplementary material
Source: PubMed Central journal article supplement (PMC7453905)

**SUPPLEMENTAL DATA**

**Supplemental Table 1.**

Table 1 Information on antibodies used in this study

| <b>Primary antibodies</b> | <b>Host and clone</b>         | <b>Species 24 Specificity</b> | <b>Dilution</b> | <b>Catalog #</b> | <b>Sources</b>                                  |
|---------------------------|-------------------------------|-------------------------------|-----------------|------------------|-------------------------------------------------|
| Glutamate                 | mouse monoclonal              | rat                           | 1:200           | MAB5304          | Milipore, Burlington, MA                        |
| TGR5                      | rabbit polyclonal             | mouse, rat,<br>human          | 1:200           | ab72608          | Abcam , Cambridge, MA                           |
| CCK-1 receptor            | goat polyclonal               | rat, human                    | 1:200           | Ab77269          | Abcam , Cambridge, MA                           |
| POMC                      | rabbit polyclonal<br>(FL-267) | rat, mouse,<br>human          | 1:200           | sc-20148         | Santa Cruz Biotechnology,<br>Dallas, TX         |
| CART                      | goat polyclonal               | rat, mouse,<br>human          | 1:200           | AF-163           | R&D System,<br>Minneapolis, MN                  |
| CRF                       | rabbit polyclonal             | mouse , rat                   | 1:200           | 20084            | Immunostar, Hudson<br>WI                        |
| c-Fos                     | mouse monoclonal<br>(E-8)     | rat, mouse,<br>human          | 1:200           | sc-166940        | Santa Cruz Biotechnology,<br>Dallas, TX         |
| Hu C/D                    | mouse monoclonal(16A11)       | rat, mouse,<br>human          | 1:200           | A-21271          | Thermo Fisher Scientific,<br><u>Waltham, MA</u> |
| NPY                       | guinea pig                    | rat, mouse,<br>human          | 1:200           | PA1-27980        | Thermo Fisher Scientific,<br><u>Waltham, MA</u> |
|                           |                               |                               |                 |                  |                                                 |

| <b>Secondary antibodies</b> | <b>Host and clone</b>                 | <b>Species Specificity</b> | <b>Dilution</b> | <b>Catalog #</b>   | <b>Sources</b>                                  |
|-----------------------------|---------------------------------------|----------------------------|-----------------|--------------------|-------------------------------------------------|
| Donkey anti-mouse IgG       | Donkey, <u>Alexa Fluor</u> 488 or 594 | mouse                      | 1:200           | A-21202<br>A32744  | Thermo Fisher Scientific,<br><u>Waltham, MA</u> |
| Donkey anti-rabbit IgG      | Donkey, Alexa Fluor 488 or 594        | rabbit                     | 1:200           | A32790<br>A32754   | Thermo Fisher Scientific,<br><u>Waltham, MA</u> |
| Donkey anti-goat IgG        | Donkey, Alexa Fluor 488 or 594        | goat                       | 1:200           | A-11055<br>A-11058 | Thermo Fisher Scientific,<br><u>Waltham, MA</u> |
| Donkey anti-Guinea pig      | Donkey, Alexa Fluor 488               | Guinea pig                 | 1:200           | SAB4600298         | Thermo Fisher Scientific,<br><u>Waltham, MA</u> |

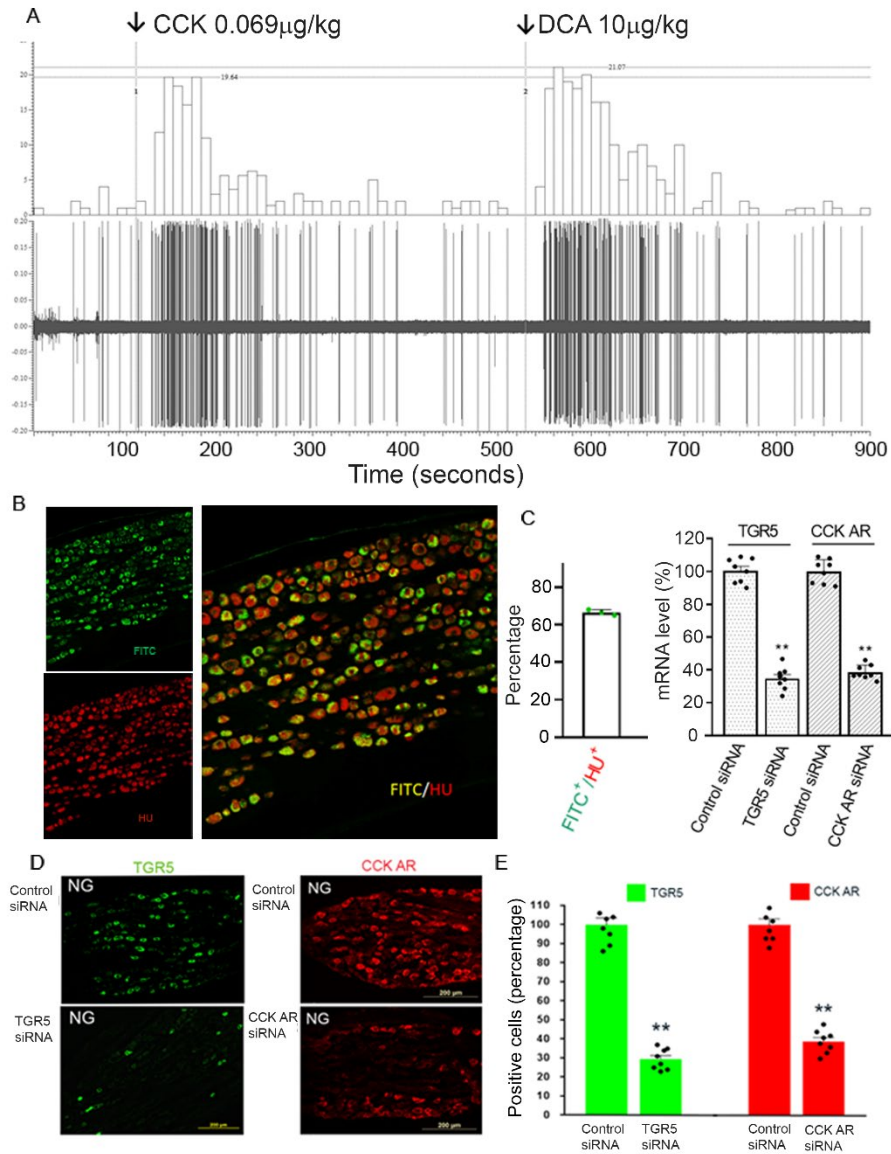

**Supplemental Figure 1. NG Recordings in Response to DCA and CCK-8 stimulation.**

A. Same units recording of vagal afferent neurons in rat nodose ganglia showing the same unit responded to both CCK-8 and DCA administrated via superior mesenteric artery (20 neurons from 4 rats were recorded). B. FITC-conjugated control siRNA colocalized with neuronal marker Hu C/D. Summarized data is shown in C (left panel). C (right panel), qPCR of TGR5 and CCK A receptor in NG 7 days after control or specific siRNA. D. Immunofluorescence staining of TGR5 (left panels) and CCK-AR (right panels) in nodose ganglia neurons after control or specific siRNA. (E) Bar graphs showing TGR5 and CCK-AR were knocked down by  $71\pm 6$  and  $61\pm 5\%$  with specific siRNAs in NG, respectively (\*\* $p < 0.01$ ,  $n = 8$ ). Unpaired Student  $t$  test.

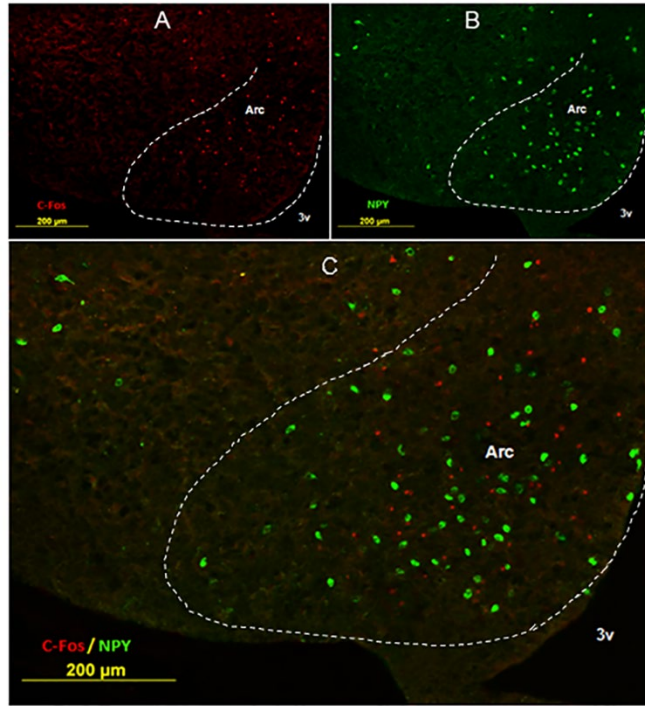

**Supplemental Figure 2. Immunofluorescence Staining of NPY in the arcuate nucleus.**

Double immunofluorescence of C-Fos and NPY in the arcuate nucleus following intravenous administration of DCA. No colocalization between c-Fos and NPY was observed indicating that NPY neurons were not activated by DCA. 3 sections were stained per rat and totally 3 rats were used. A. C-fos staining. B. NPY staining. C. Merged image. Arc, arcuate nucleus; 3v, third ventricle.

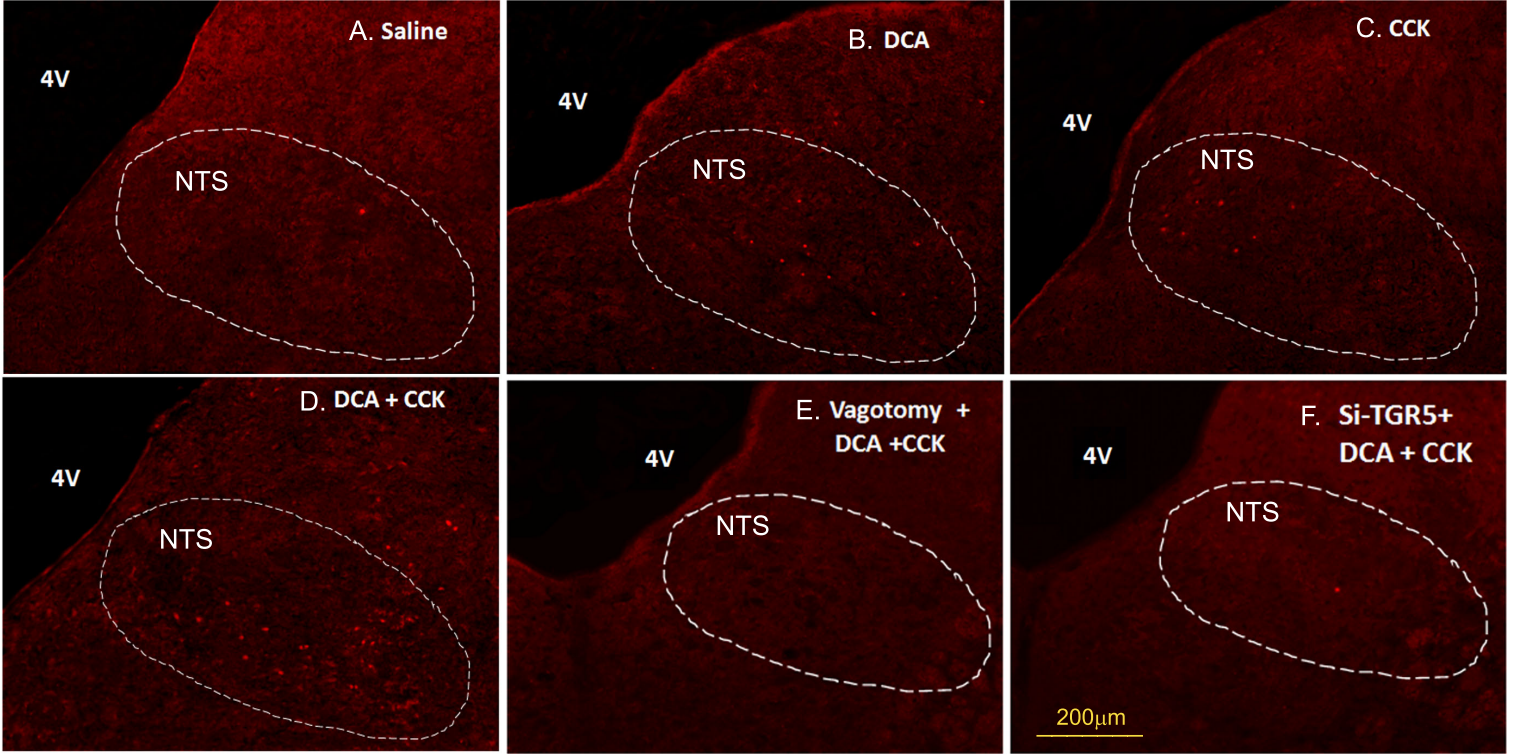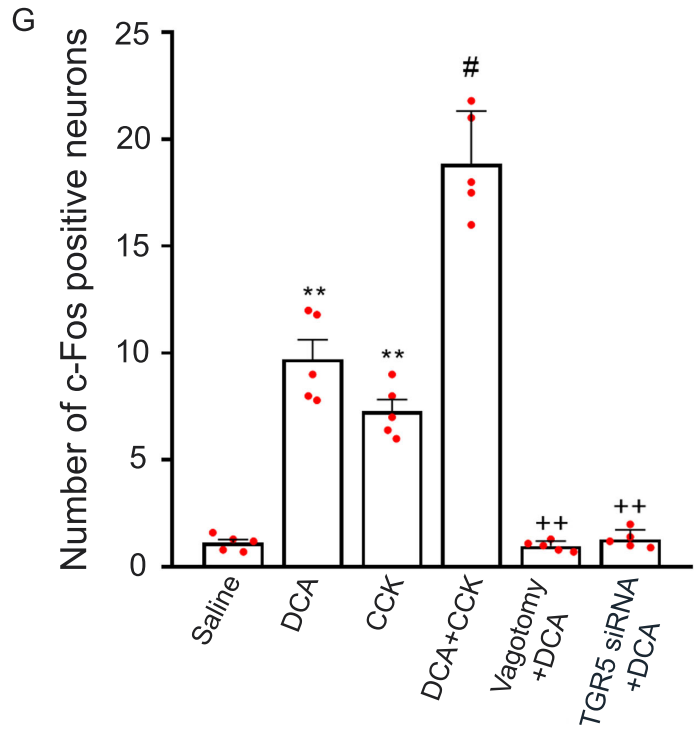

Supplement: jciinsight-5-132400-s145.pdf [file jciinsight-5-132400-s145.pdf]
